# Supplementary material for: The ESRP1-GPR137 axis contributes to intestinal pathogenesis
Source: eLife journal article supplement (doi:10.7554/elife.28366), 2017-10-04
Supplement: supp [file elife-28366-supp-v1.zip]

Archive with 21 entries (21 files):
- elife_poa_e28366_Supplementary_file_2.docx
- elife_poa_e28366_Figure_6_source_data_1.xlsx
- elife_poa_e28366_Figure_6_figure_supplement_2.svg
- elife_poa_e28366_Figure_4_figure_supplement_3.svg
- elife_poa_e28366_Figure_4_figure_supplement_1.svg
- elife_poa_e28366_Supplementary_file_1.xlsx
- elife_poa_e28366_Figure_3_figure_supplement_3.svg
- elife_poa_e28366_Figure_6_figure_supplement_1.svg
- elife_poa_e28366_Figure_4_figure_supplement_2.svg
- elife_poa_e28366_Figure_3_source_data_1.xlsx
- elife_poa_e28366_Figure_6_source_data_2.xlsx
- elife_poa_e28366_Figure_1_figure_supplement_1.svg
- elife_poa_e28366_Figure_2_source_data_1.xlsx
- elife_poa_e28366_Figure_5_figure_supplement_2.svg
- elife_poa_e28366_Figure_3_figure_supplement_1.svg
- elife_poa_e28366_Figure_6_source_data_3.xlsx
- elife_poa_e28366_Figure_2_figure_supplement_1.svg
- elife_poa_e28366_Figure_3_figure_supplement_2.svg
- elife_poa_e28366_Figure_5_figure_supplement_3.svg
- elife_poa_e28366_Figure_5_figure_supplement_1.svg
- elife_poa_e28366_Transparent_Reporting_Form.pdf
