# Supplementary material for: The ESRP1-GPR137 axis contributes to intestinal pathogenesis
Source: eLife journal article supplement (doi:10.7554/elife.28366), 2017-10-04
Supplement: supp [file elife-28366-supp-v1.zip › elife_poa_e28366_Figure_2_source_data_1.xlsx]

## Sheet: Sheet1
Altered ratios of transcript isoforms in Triaka epithelial cells
Gene name	Transcription Start Site	Isoform#	Ensembl ID	JSD	P-value	Q-value	FPKM WT	FPKM Triaka
Fgf11	TSS12117	1	new.3276.3	0.514478	5e-05	0.0132622	0.08479	0.37292
	TSS12117	2	new.3276.4	0.514478	5e-05	0.0132622	0.3659	0.05134
Ptprf	TSS50521	1	new.15004.2	0.496677	5e-05	0.0132622	0.11421	0
	TSS50521	2	new.15004.4	0.496677	5e-05	0.0132622	0.0511	0.04407
	TSS50521	3	new.15004.8	0.496677	5e-05	0.0132622	17.1107	2.17418
	TSS50521	4	ENSMUST00000049074	0.496677	5e-05	0.0132622	5.55785	20.7928
Hmgb3	TSS75218	1	new.22714.2	0.475909	5e-05	0.0132622	0.9843	0.92635
	TSS75218	2	ENSMUST00000114582	0.475909	5e-05	0.0132622	0.68572	4.38148
	TSS75218	3	ENSMUST00000015361	0.475909	5e-05	0.0132622	0.07258	0.01512
	TSS75218	4	ENSMUST00000088874	0.475909	5e-05	0.0132622	3.62529	0.71092
Cybasc3	TSS32891	1	new.10696.4	0.474708	5e-05	0.0132622	1.96187	8.79606
	TSS32891	2	ENSMUST00000099694	0.474708	5e-05	0.0132622	13.0961	2.62139
	TSS32891	3	ENSMUST00000099695	0.474708	5e-05	0.0132622	0	0.03125
Ruvbl2	TSS65063	1	new.19103.1	0.473058	5e-05	0.0132622	11.4036	1.96537
	TSS65063	2	new.19103.2	0.473058	5e-05	0.0132622	0.22806	9.42324
	TSS65063	3	ENSMUST00000107771	0.473058	5e-05	0.0132622	8.96789	9.65701
	TSS65063	4	ENSMUST00000141761	0.473058	5e-05	0.0132622	0	0.13685
Cd44	TSS40538	1	new.12023.1	0.463085	5e-05	0.0132622	0.56937	0.11078
	TSS40538	2	new.12023.2	0.463085	5e-05	0.0132622	0.94222	0.20734
	TSS40538	3	new.12023.3	0.463085	5e-05	0.0132622	2.92576	3.27209
	TSS40538	4	new.12023.4	0.463085	5e-05	0.0132622	0.16032	3.32863
	TSS40538	5	new.12023.6	0.463085	5e-05	0.0132622	1.41382	0.16755
	TSS40538	6	ENSMUST00000005218	0.463085	5e-05	0.0132622	0.12277	0.09023
	TSS40538	7	ENSMUST00000111194	0.463085	5e-05	0.0132622	0.10845	0.09504
	TSS40538	8	ENSMUST00000111196	0.463085	5e-05	0.0132622	0.04263	0.00996
	TSS40538	9	ENSMUST00000111197	0.463085	5e-05	0.0132622	0.0865	0.22952
	TSS40538	10	ENSMUST00000111199	0.463085	5e-05	0.0132622	0.52754	0.08627
	TSS40538	11	ENSMUST00000111200	0.463085	5e-05	0.0132622	0.02243	0.00978
	TSS40538	12	ENSMUST00000111189	0.463085	5e-05	0.0132622	0	0.01497
Hnrnpa3	TSS36188	1	new.11800.3	0.454791	5e-05	0.0132622	4.2163	2.34483
	TSS36188	2	new.11800.4	0.454791	5e-05	0.0132622	0	2.19579
Uap1	TSS3813	1	ENSMUST00000111350	0.419816	5e-05	0.0132622	3.75697	43.931
	TSS3813	2	ENSMUST00000111351	0.419816	5e-05	0.0132622	71.189	27.7634
	TSS3813	3	ENSMUST00000027981	0.419816	5e-05	0.0132622	26.6531	9.80643
Col16a1	TSS47959	1	new.15223.1	0.415413	5e-05	0.0132622	2.70208	1.24444
	TSS47959	2	new.15223.2	0.415413	5e-05	0.0132622	0.01738	1.00917
	TSS47959	3	ENSMUST00000044565	0.415413	5e-05	0.0132622	0.00259	0.11746
	TSS47959	4	new.15223.3	0.415413	5e-05	0.0132622	0.08196	0.05458
B230206F22Rik	TSS77707	1	new.22927.1	0.397523	5e-05	0.0132622	3e-05	0
	TSS77707	2	new.22927.2	0.397523	5e-05	0.0132622	0.09775	0.20756
	TSS77707	3	ENSMUST00000156240	0.397523	5e-05	0.0132622	0.01805	0.02295
	TSS77707	4	new.22927.11	0.397523	5e-05	0.0132622	0.21834	0
	TSS77707	5	new.22927.13	0.397523	5e-05	0.0132622	0.54296	1e-05
	TSS77707	6	new.22927.14	0.397523	5e-05	0.0132622	5e-05	0
	TSS77707	7	new.22927.7	0.397523	5e-05	0.0132622	0.0663	0
	TSS77707	8	new.22927.8	0.397523	5e-05	0.0132622	0.02549	0.12646
	TSS77707	9	ENSMUST00000145803	0.397523	5e-05	0.0132622	0.85618	0.68565
4933434E20Rik	TSS43123	1	ENSMUST00000160640	0.391654	5e-05	0.0132622	2.27219	2.70675
	TSS43123	2	ENSMUST00000159202	0.391654	5e-05	0.0132622	0.01386	0.00352
	TSS43123	3	ENSMUST00000029552	0.391654	5e-05	0.0132622	0.60734	0.46197
	TSS43123	4	ENSMUST00000162114	0.391654	5e-05	0.0132622	0.83553	0.58952
	TSS43123	5	ENSMUST00000162595	0.391654	5e-05	0.0132622	0.29937	0.69832
	TSS43123	6	ENSMUST00000171025	0.391654	5e-05	0.0132622	0.20668	5.81206
	TSS43123	7	ENSMUST00000161918	0.391654	5e-05	0.0132622	10.8849	4.77728
Gpr137	TSS33800	1	ENSMUST00000099776	0.38115	5e-05	0.0132622	5.109	2.66047
	TSS33800	2	ENSMUST00000166115	0.38115	5e-05	0.0132622	0.5731	3.91172
Strn	TSS30696	1	new.9749.2	0.378052	5e-05	0.0132622	0.39713	2.13948
	TSS30696	2	new.9749.6	0.378052	5e-05	0.0132622	0.05618	0.07418
	TSS30696	3	ENSMUST00000145910	0.378052	5e-05	0.0132622	3.84596	1.55477
Hnrnpa3	TSS36189	1	new.11800.11	0.361657	5e-05	0.0132622	0.5765	2.66536
	TSS36189	2	new.11800.12	0.361657	5e-05	0.0132622	3.80631	1.69742
6720456H20Rik	TSS19845	1	ENSMUST00000133744	0.35992	5e-05	0.0132622	0.2288	0.13466
	TSS19845	2	ENSMUST00000037990	0.35992	5e-05	0.0132622	1.84793	0.00169
	TSS19845	3	ENSMUST00000111735	0.35992	5e-05	0.0132622	3.7583	6.01235
	TSS19845	4	ENSMUST00000153765	0.35992	5e-05	0.0132622	0	0.11992
	TSS19845	5	ENSMUST00000156480	0.35992	5e-05	0.0132622	0.00804	0.00709
Ube3a	TSS62227	1	new.19206.1	0.35975	5e-05	0.0132622	1.59857	0.1467
	TSS62227	2	new.19206.2	0.35975	5e-05	0.0132622	0.81127	0.4744
	TSS62227	3	new.19206.3	0.35975	5e-05	0.0132622	0.24278	2.89048
	TSS62227	4	new.19206.6	0.35975	5e-05	0.0132622	0.36655	0.71922
	TSS62227	5	ENSMUST00000085231	0.35975	5e-05	0.0132622	4.11047	2.46072
	TSS62227	6	ENSMUST00000107537	0.35975	5e-05	0.0132622	2.08468	3.62065
Dctd	TSS67664	1	ENSMUST00000165930	0.345228	5e-05	0.0132622	1.47304	0.78044
	TSS67664	2	new.20445.5	0.345228	5e-05	0.0132622	0.12232	0.04906
	TSS67664	3	new.20445.6	0.345228	5e-05	0.0132622	0.10097	0.16903
	TSS67664	4	new.20445.7	0.345228	5e-05	0.0132622	0.01888	0.04035
	TSS67664	5	ENSMUST00000170263	0.345228	5e-05	0.0132622	0.08465	0.66265
	TSS67664	6	ENSMUST00000033966	0.345228	5e-05	0.0132622	0	0.11883
Sfmbt1	TSS19601	1	new.6410.8	0.316686	5e-05	0.0132622	0.13098	0.00025
	TSS19601	2	ENSMUST00000112177	0.316686	5e-05	0.0132622	1.61609	1.18734
	TSS19601	3	new.6410.10	0.316686	5e-05	0.0132622	4e-05	0.41997
Trappc9	TSS23888	1	ENSMUST00000089770	0.314009	5e-05	0.0132622	2.6905	7.0495
	TSS23888	2	new.7442.5	0.314009	5e-05	0.0132622	6.44994	2.5967
	TSS23888	3	ENSMUST00000170633	0.314009	5e-05	0.0132622	0.06088	0.08226
	TSS23888	4	ENSMUST00000168191	0.314009	5e-05	0.0132622	0.04713	0
Scrib	TSS23972	1	ENSMUST00000063747	0.312346	5e-05	0.0132622	8.2088	13.5059
	TSS23972	2	new.7453.6	0.312346	5e-05	0.0132622	1.68089	0.0308
	TSS23972	3	ENSMUST00000109946	0.312346	5e-05	0.0132622	4e-05	0
	TSS23972	4	ENSMUST00000109945	0.312346	5e-05	0.0132622	5.23873	1.3364
Uap1l1	TSS38941	1	new.11345.2	0.309547	5e-05	0.0132622	0.0283	0.10025
	TSS38941	2	new.11345.3	0.309547	5e-05	0.0132622	0.89718	0.42833
	TSS38941	3	new.11345.4	0.309547	5e-05	0.0132622	0.32246	0
	TSS38941	4	new.11345.5	0.309547	5e-05	0.0132622	0.11103	0.16117
	TSS38941	5	new.11345.6	0.309547	5e-05	0.0132622	0.06122	0.0212
	TSS38941	6	new.11345.8	0.309547	5e-05	0.0132622	0.08327	0.01355
	TSS38941	7	new.11345.9	0.309547	5e-05	0.0132622	0.40859	0.16086
	TSS38941	8	ENSMUST00000102925	0.309547	5e-05	0.0132622	2.62209	11.0916
	TSS38941	9	ENSMUST00000152537	0.309547	5e-05	0.0132622	0.05652	0.45753
Flnb	TSS19351	1	new.6221.3	0.300051	5e-05	0.0132622	26.4286	52.528
	TSS19351	2	ENSMUST00000052678	0.300051	5e-05	0.0132622	23.0197	5.5938
Klhl12	TSS1372	1	ENSMUST00000133721	0.284269	5e-05	0.0132622	0.23064	0.16947
	TSS1372	2	ENSMUST00000112232	0.284269	5e-05	0.0132622	0.00019	0
	TSS1372	3	ENSMUST00000027725	0.284269	5e-05	0.0132622	2.4819	4.72323
	TSS1372	4	ENSMUST00000116528	0.284269	5e-05	0.0132622	2.41902	0.70569
Nsfl1c	TSS37623	1	new.12451.4	0.255709	5e-05	0.0132622	0.22545	0.2028
	TSS37623	2	new.12451.2	0.255709	5e-05	0.0132622	1.71654	1.50944
	TSS37623	3	new.12451.3	0.255709	5e-05	0.0132622	0	0.01908
	TSS37623	4	new.12451.5	0.255709	5e-05	0.0132622	0.01186	2.25446
	TSS37623	5	new.12451.6	0.255709	5e-05	0.0132622	10.0083	7.97449
	TSS37623	6	new.12451.7	0.255709	5e-05	0.0132622	0.65107	0.80267
	TSS37623	7	ENSMUST00000153333	0.255709	5e-05	0.0132622	0.26677	0.25697
Nf2	TSS10850	1	new.2649.4	0.246547	5e-05	0.0132622	16.4663	8.23896
	TSS10850	2	ENSMUST00000109910	0.246547	5e-05	0.0132622	4.6884	11.0627
	TSS10850	3	ENSMUST00000109907	0.246547	5e-05	0.0132622	1.97844	2.46655
Inf2	TSS15328	1	new.5162.1	0.242445	5e-05	0.0132622	0	0.02118
	TSS15328	2	new.5162.2	0.242445	5e-05	0.0132622	0.58995	0.17619
	TSS15328	3	new.5162.3	0.242445	5e-05	0.0132622	1.11194	1.77031
	TSS15328	4	ENSMUST00000039111	0.242445	5e-05	0.0132622	1.10095	2.57379
	TSS15328	5	ENSMUST00000101029	0.242445	5e-05	0.0132622	3.431	1.8409
Usp4	TSS71834	1	ENSMUST00000035237	0.224636	5e-05	0.0132622	25.3044	30.8827
	TSS71834	2	ENSMUST00000076375	0.224636	5e-05	0.0132622	8.15579	1.11236
Pcdh1	TSS32105	1	new.10155.3	0.222028	5e-05	0.0132622	0.41035	4.52409
	TSS32105	2	new.10155.7	0.222028	5e-05	0.0132622	15.731	12.5205
	TSS32105	3	ENSMUST00000057185	0.222028	5e-05	0.0132622	16.4629	8.94575
Timm17b	TSS74580	1	new.22445.1	0.208474	5e-05	0.0132622	1.42174	0.18549
	TSS74580	2	ENSMUST00000033498	0.208474	5e-05	0.0132622	5.87704	8.12148
Epb4.1	TSS50942	1	ENSMUST00000105970	0.207881	5e-05	0.0132622	0.17344	0.09158
	TSS50942	2	ENSMUST00000105975	0.207881	5e-05	0.0132622	0	0.05335
	TSS50942	3	new.15340.9	0.207881	5e-05	0.0132622	8.66811	4.256
	TSS50942	4	ENSMUST00000146021	0.207881	5e-05	0.0132622	4.86355	7.9477
	TSS50942	5	ENSMUST00000131953	0.207881	5e-05	0.0132622	0	0.11717
Arhgef11	TSS42955	1	new.13529.2	0.198211	5e-05	0.0132622	0.19301	0.09783
	TSS42955	2	new.13529.3	0.198211	5e-05	0.0132622	6.38129	5.06668
	TSS42955	3	new.13529.4	0.198211	5e-05	0.0132622	10.0475	9.44918
	TSS42955	4	new.13529.5	0.198211	5e-05	0.0132622	0	0.06417
	TSS42955	5	new.13529.6	0.198211	5e-05	0.0132622	0.23299	0.09253
	TSS42955	6	ENSMUST00000039476	0.198211	5e-05	0.0132622	0	1.73473
Hsd3b2	TSS45175	1	ENSMUST00000107022	0.174995	5e-05	0.0132622	1.86523	7.05337
	TSS45175	2	new.13704.2	0.174995	5e-05	0.0132622	0.00016	0
	TSS45175	3	ENSMUST00000107021	0.174995	5e-05	0.0132622	11.5005	13.1221
Magi1	TSS59838	1	ENSMUST00000055224	0.497752	0.0001	0.024535	0.37982	0.24966
	TSS59838	2	ENSMUST00000089317	0.497752	0.0001	0.024535	0	0.31293
Ap1s3	TSS2876	1	new.544.11	0.407759	0.00015	0.03505	0	0.01624
	TSS2876	2	new.544.12	0.407759	0.00015	0.03505	0	0.08457
	TSS2876	3	new.544.10	0.407759	0.00015	0.03505	0.21768	0.53632
	TSS2876	4	new.544.5	0.407759	0.00015	0.03505	0.15884	0.09015
	TSS2876	5	new.544.7	0.407759	0.00015	0.03505	0.27122	0
	TSS2876	6	new.544.2	0.407759	0.00015	0.03505	0.16203	0
	TSS2876	7	new.544.3	0.407759	0.00015	0.03505	0.41015	0.44879
	TSS2876	8	new.544.4	0.407759	0.00015	0.03505	0.85811	0.08376
Mgll	TSS57814	1	ENSMUST00000113585	0.307473	0.00015	0.03505	1.25474	4.56716
	TSS57814	2	new.17882.2	0.307473	0.00015	0.03505	7.76241	3.48857
	TSS57814	3	new.17882.3	0.307473	0.00015	0.03505	0.07093	0.0001
	TSS57814	4	ENSMUST00000151699	0.307473	0.00015	0.03505	0.14436	0.04091
	TSS57814	5	ENSMUST00000113580	0.307473	0.00015	0.03505	0	7e-05
	TSS57814	6	ENSMUST00000113581	0.307473	0.00015	0.03505	1.00288	1.04772
Tex2	TSS13545	1	new.4042.3	0.188094	0.0002	0.0456465	0.34651	1.27425
	TSS13545	2	new.4042.2	0.188094	0.0002	0.0456465	2.11439	0.80116
	TSS13545	3	ENSMUST00000042780	0.188094	0.0002	0.0456465	6.38062	5.25559
