# Supplementary material for: The ESRP1-GPR137 axis contributes to intestinal pathogenesis
Source: eLife journal article supplement (doi:10.7554/elife.28366), 2017-10-04
Supplement: supp [file elife-28366-supp-v1.zip › elife_poa_e28366_Figure_3_source_data_1.xlsx]

## Sheet: KEGG
Cell Cycle (KEGG)
Gene name	WT normalized counts	Triaka normalized counts	logFC	Adjusted P-Value
Gadd45a	4186.77	2726.72	-0.6065	0.00026
Tfdp2	2172.3	2540.4	0.22458	0.0134
Ccne1	156.356	231.659	0.55223	0.0184
Smad4	4857.79	4340.08	-0.1617	0.063
Cdkn2c	244.06	353.32	0.51	0.0697
Stag2	3912.03	4669.09	0.25	0.155
Bub3	1495.9	1803.29	0.27	0.163
Dbf4	625.95	770.28	0.3	0.164
Skp2	155.22	204.02	0.39	0.2
Chek2	503.12	627.24	0.31	0.216
Cdc7	258.71	348.03	0.41	0.235
Rbl2	1803.03	2028.51	0.17	0.261
E2f2	1260.2	1580.89	0.32	0.275
Ccne2	166.58	229.6	0.44	0.28
Ccna2	1797.79	2467.61	0.43	0.306
Cdk1	933.14	1297.45	0.45	0.319
Mcm6	2063.02	2732.23	0.39	0.324
Hdac1	1251.52	1090.92	-0.2	0.369
Tfdp1	1813.49	2009.09	0.15	0.381
Cdkn1c	74.94	115.04	0.55	0.402
Ttk	289.12	388.35	0.4	0.411
Anapc11	662.75	737.87	0.15	0.423
Orc3	1070.85	991.13	-0.11	0.443
Mcm5	1484.09	1870.58	0.32	0.452
Ywhaq	2795.21	3065.11	0.13	0.461
Bub1	448.64	600.53	0.4	0.468
Ccnb2	777.07	1025.28	0.38	0.482
E2f4	2033.23	1909.84	-0.09	0.484
Cdc23	1007.27	1123.2	0.16	0.507
Ep300	5179.28	4724.76	-0.13	0.516
Plk1	671.37	863.78	0.34	0.52
Prkdc	1052.02	1152.29	0.13	0.53
Cdkn1b	2930.13	2675.27	-0.13	0.533
Ccnh	504.16	551.79	0.13	0.543
Orc1	420.37	374.83	-0.16	0.549
Bub1b	937.28	1206.14	0.34	0.55
Hdac2	1574.54	1709.18	0.12	0.552
Cdk7	1043.92	1130.21	0.11	0.573
Cdc6	212.36	252.25	0.24	0.588
Mcm7	1319.98	1554	0.23	0.59
Atr	831.06	965.92	0.21	0.603
Cdc20	847.27	1068.34	0.32	0.607
E2f5	1038.46	1127.68	0.12	0.616
Espl1	545.45	696.62	0.33	0.622
E2f1	217.66	252.52	0.21	0.634
Cdc25b	704.27	860.13	0.28	0.636
Smad2	1664.53	1541.84	-0.11	0.64
Mad1l1	461.49	498.61	0.11	0.646
Cdc25c	172.99	219.53	0.32	0.678
Mcm2	1303.47	1497.3	0.19	0.692
Cdk2	854.97	943.69	0.14	0.693
Mcm3	1128.66	1302.47	0.2	0.693
Smc1a	3731.43	4019.14	0.11	0.701
Cdc26	662.01	712.94	0.1	0.708
Cdc14a	2281.29	2104.48	-0.12	0.708
Tgfb1	112.36	130.52	0.21	0.717
Wee1	411.63	456.96	0.15	0.72
Smc3	2423.82	2608.85	0.11	0.723
Cdc16	1382.73	1465.2	0.08	0.728
Pcna	1127.41	1228.35	0.12	0.733
Cdc45	357.45	414.32	0.21	0.736
Anapc1	4713.32	4947.07	0.07	0.737
Cdkn1a	11466.8	10175.8	-0.17	0.754
Orc2	583.71	625.57	0.1	0.762
Atm	1729.84	1830.33	0.08	0.765
Rbl1	1542.42	1641.92	0.09	0.774
Pkmyt1	705.64	771.84	0.13	0.791
Abl1	4312.63	4507.86	0.06	0.791
Fzr1	1801.78	1900.67	0.08	0.791
Cdkn2d	255.91	277.44	0.11	0.791
Mcm4	1237.46	1384.67	0.16	0.794
Chek1	213.27	246.75	0.2	0.795
Rad21	6444.35	6843.77	0.09	0.798
Ywhag	3576.59	3708.47	0.05	0.809
Ccnd2	8556.15	9240.64	0.11	0.832
Skp1a	5155.22	5491.26	0.09	0.845
Sfn	12306.7	13870.5	0.16	0.846
Cdkn2b	1844.64	1714.42	-0.1	0.856
Stag1	1757.51	1835.46	0.06	0.861
Mad2l2	240.08	254.27	0.08	0.862
Ccnd1	3524.15	3712.44	0.07	0.864
Cdc25a	2130.35	2254.6	0.08	0.867
Crebbp	2051.23	1945.49	-0.07	0.875
Cdc27	2089.32	2166.67	0.05	0.885
Smad3	2547.11	2460.2	-0.05	0.895
Ywhah	7084.67	6900.92	-0.04	0.899
Trp53	1474.51	1553.03	0.07	0.903
Anapc10	209.29	219.58	0.06	0.916
Orc6	371.97	392.41	0.08	0.917
E2f3	788.07	766.11	-0.04	0.919
Gadd45g	934.89	901.02	-0.05	0.929
Cdk6	695.27	738.09	0.08	0.933
Myc	1289.57	1380.93	0.09	0.936
Gadd45b	620.17	592.12	-0.07	0.937
Cul1	4123.4	4193.75	0.02	0.941
Ccnd3	1556.72	1523.99	-0.03	0.941
Gsk3b	3716.46	3660.49	-0.02	0.941
Anapc4	1290.57	1312.5	0.03	0.947
Anapc5	3190.55	3267.56	0.03	0.951
Ywhab	10208.9	10430.6	0.03	0.955
Zbtb17	875.99	860.95	-0.03	0.958
Rb1	2677.29	2628.36	-0.03	0.965
Mdm2	1911.86	1887.44	-0.02	0.97
Ywhae	11564.4	11654.5	0.01	0.975
Orc5	652.68	644.5	-0.02	0.975
Ywhaz	11444.9	11560.7	0.01	0.98
Anapc13	1233	1242.74	0.01	0.985
Pttg1	866.07	859.27	-0.01	0.985
Orc4	1233.59	1227.06	-0.01	0.987
Anapc2	3900.42	3892.27	0	0.992
Anapc7	1331.86	1331.33	0	0.998
Cdc14b	925.12	924.01	0	0.998
Ccna1	20.53	17.6	-0.17	1
Cdkn2a	0.24	0.23	0	1
Tgfb2	3.59	4.07	0.11	1
Tgfb3	7.47	4.95	-0.42	1
Smc1b	0.26	1	-0.1	1
Ccnb3	1	0.48	0.24	1
Wee2	3.37	4.55	0.26	1

## Sheet: WikiPathways
Cell Cycle (WikiPathways)
Gene name	WT normalized counts	Triaka normalized counts	logFC	Adjusted P-Value
Gadd45a	4186.77	2726.72	-0.6065	0.00026
Ccne1	156.356	231.659	0.55223	0.0184
Smad4	4857.79	4340.08	-0.16	0.063
Bub3	1495.9	1803.29	0.27	0.163
Dbf4	625.95	770.28	0.3	0.164
Skp2	155.22	204.02	0.39	0.2
Chek2	503.12	627.24	0.31	0.216
Cdc7	258.71	348.03	0.41	0.235
E2f2	1260.2	1580.89	0.32	0.275
Ccne2	166.58	229.6	0.44	0.28
Cdh1	58257.7	50520.2	-0.2	0.299
Ccna2	1797.79	2467.61	0.43	0.306
Cdk1	933.14	1297.45	0.45	0.319
Mcm6	2063.02	2732.23	0.39	0.324
Tfdp1	1813.49	2009.09	0.15	0.381
Tbc1d8	670.71	589.03	-0.18	0.426
Orc3	1070.85	991.13	-0.11	0.443
Mcm5	1484.09	1870.58	0.32	0.452
E2f6	400.01	479.43	0.25	0.459
Bub1	448.64	600.53	0.4	0.468
Ccnb2	777.07	1025.28	0.38	0.482
E2f4	2033.23	1909.84	-0.09	0.484
Ep300	5179.28	4724.76	-0.13	0.516
Plk1	671.37	863.78	0.34	0.52
Prkdc	1052.02	1152.29	0.13	0.53
Cdkn1b	2930.13	2675.27	-0.13	0.533
Ccnh	504.16	551.79	0.13	0.543
Orc1	420.37	374.83	-0.16	0.549
Bub1b	937.28	1206.14	0.34	0.55
Hdac2	1574.54	1709.18	0.12	0.552
Cdc6	212.36	252.25	0.24	0.588
Mcm7	1319.98	1554	0.23	0.59
Atr	831.06	965.92	0.21	0.603
Hdac5	1945.74	1667.78	-0.22	0.605
Cdc20	847.27	1068.34	0.32	0.607
E2f5	1038.46	1127.68	0.12	0.616
Espl1	545.45	696.62	0.33	0.622
E2f1	217.66	252.52	0.21	0.634
Cdc25b	704.27	860.13	0.28	0.636
Mad1l1	461.49	498.61	0.11	0.646
Cdc25c	172.99	219.53	0.32	0.678
Mcm2	1303.47	1497.3	0.19	0.692
Cdk2	854.97	943.69	0.14	0.693
Mcm3	1128.66	1302.47	0.2	0.693
Cdc14a	2281.29	2104.48	-0.12	0.708
Tgfb1	112.36	130.52	0.21	0.717
Wee1	411.63	456.96	0.15	0.72
Pcna	1127.41	1228.35	0.12	0.733
Cdc45	357.45	414.32	0.21	0.736
Cdkn1a	11466.8	10175.8	-0.17	0.754
Orc2	583.71	625.57	0.1	0.762
Atm	1729.84	1830.33	0.08	0.765
Rbl1	1542.42	1641.92	0.09	0.774
Pkmyt1	705.64	771.84	0.13	0.791
Abl1	4312.63	4507.86	0.06	0.791
Mcm4	1237.46	1384.67	0.16	0.794
Chek1	213.27	246.75	0.2	0.795
Hdac6	664.38	707.34	0.09	0.795
Ywhag	3576.59	3708.47	0.05	0.809
Ccnd2	8556.15	9240.64	0.11	0.832
Mad2l2	240.08	254.27	0.08	0.862
Hdac4	1069.3	1012.45	-0.08	0.864
Cdc25a	2130.35	2254.6	0.08	0.867
Smad3	2547.11	2460.2	-0.05	0.895
Trp53	1474.51	1553.03	0.07	0.903
Hdac3	2488.88	2555.89	0.04	0.909
Orc6	371.97	392.41	0.08	0.917
E2f3	788.07	766.11	-0.04	0.919
Mpeg1	65.29	57.43	-0.16	0.926
Cdk6	695.27	738.09	0.08	0.933
Ccnd3	1556.72	1523.99	-0.03	0.941
Gsk3b	3716.46	3660.49	-0.02	0.941
Hdac7	352.27	367.2	0.06	0.963
Rb1	2677.29	2628.36	-0.03	0.965
Mdm2	1911.86	1887.44	-0.02	0.97
Orc5	652.68	644.5	-0.02	0.975
Pttg1	866.07	859.27	-0.01	0.985
Orc4	1233.59	1227.06	-0.01	0.987
Cdc14b	925.12	924.01	0	0.998
Ccna1	20.53	17.6	-0.17	1
Cdkn2a	0.24	0.23	0	1
Smc1b	0.26	1	-0.1	1
Ccnb3	1	0.48	0.24	1

## Sheet: GOBP
DNA replication (GOBP)
Gene name	WT normalized counts	Triaka normalized counts	logFC	Adjusted P-Value
Polg2	899.001	733.987	-0.29	0.00036
Ccne1	156.356	231.659	0.55223	0.0184
Helb	1388.17	1114.99	-0.3142	0.0221
Parp4	4314.2	3776.64	-0.1909	0.0373
Tk1	487.32	748.85	0.58	0.14
Rfc4	307.81	404.7	0.39	0.148
Adra2a	1955.88	1610.94	-0.28	0.157
Rrm1	1740.04	2333.25	0.41	0.159
Nfib	1676.37	1954.21	0.22	0.159
Pura	3340.69	4008.83	0.26	0.164
Dbf4	625.95	770.28	0.3	0.164
Lig4	579.41	683.27	0.23	0.175
Rrm2	568.67	801.64	0.47	0.206
Ccdc111	710.14	637.53	-0.16	0.246
Poli	290.19	240.91	-0.26	0.247
Fam111a	375.33	525.11	0.46	0.268
Rad51	380.92	500.75	0.38	0.27
Ccne2	166.58	229.6	0.44	0.28
Rpa1	1474.03	1713.74	0.22	0.306
Mcm6	2063.02	2732.23	0.39	0.324
Rmi1	349.81	403.87	0.2	0.329
Prim1	389.3	505.42	0.36	0.37
Pole	526.71	700.63	0.39	0.372
Mcm8	182.75	235.56	0.35	0.39
Rbbp4	4113.38	4477.53	0.12	0.401
Top2a	4226.83	5897.59	0.45	0.406
Nol8	554.83	632.92	0.19	0.426
Orc3	1070.85	991.13	-0.11	0.443
Tipin	291.33	352.71	0.27	0.443
Recql	604.15	681.69	0.17	0.448
Mcm5	1484.09	1870.58	0.32	0.452
Brca2	209.38	281.17	0.4	0.454
Pola1	615.27	810.57	0.38	0.459
Gins3	114.87	150.02	0.37	0.461
Nfix	1873.37	1591.25	-0.23	0.479
Polq	241.18	316.64	0.37	0.483
Tbrg1	5580.71	5233.73	-0.09	0.484
Chtf18	240.08	306.03	0.34	0.496
2810417H13Rik	592.67	781.91	0.38	0.499
Chaf1b	336.2	410.76	0.28	0.502
Mcm10	562.3	659.01	0.23	0.511
E4f1	1141.63	1054.48	-0.11	0.511
Brca1	411.54	516.26	0.31	0.543
Orc1	420.37	374.83	-0.16	0.549
Zranb3	179.45	231.24	0.35	0.55
Slbp	1688.62	1859.65	0.14	0.558
Fen1	561.75	670.89	0.25	0.568
Pold2	992.95	1149.79	0.21	0.568
Cdt1	608.44	703.91	0.21	0.568
Slx4	553.53	619.35	0.16	0.581
Polh	355.71	404.89	0.19	0.582
Lig1	1333.61	1593.49	0.25	0.585
Cdc6	212.36	252.25	0.24	0.588
Dtl	503.33	604.43	0.26	0.589
Mcm7	1319.98	1554	0.23	0.59
Top2b	4602.16	4968.72	0.11	0.597
Mms22l	407.54	499.87	0.28	0.6
Gins1	96.47	117.94	0.28	0.605
Pola2	746.22	851.67	0.19	0.62
Polb	737.31	674.08	-0.13	0.627
Lrwd1	547.96	509.02	-0.11	0.634
Fancm	322.37	361.39	0.17	0.638
Blm	208.49	259.82	0.3	0.646
Papd7	1037.37	1115.16	0.1	0.648
Prim2	259.28	310.52	0.25	0.65
Dscc1	70.34	85.68	0.27	0.654
Pold1	759.11	853.17	0.17	0.664
Ticrr	351.42	428.01	0.27	0.664
Pold3	1254.79	1348.23	0.1	0.674
Mcm2	1303.47	1497.3	0.19	0.692
Dnajc2	997.65	1059.74	0.09	0.693
Mcm3	1128.66	1302.47	0.2	0.693
Gins2	280.91	328.63	0.22	0.699
Rmi2	97.79	113.83	0.21	0.723
Top1	4412.89	4669.2	0.08	0.723
Rfc5	443.38	496.83	0.16	0.725
Rbbp7	3222.35	3486.18	0.11	0.731
Nfia	803.22	746.88	-0.1	0.733
Pcna	1127.41	1228.35	0.12	0.733
Cdc45	357.45	414.32	0.21	0.736
Rfc2	1319.06	1417.96	0.1	0.744
Recql4	236.91	263.11	0.15	0.749
Peo1	967.7	900.49	-0.1	0.751
Rpain	256.3	287.72	0.16	0.752
Repin1	653.22	707.46	0.11	0.755
Orc2	583.71	625.57	0.1	0.762
Chaf1a	625.91	719.03	0.19	0.765
Rbms1	951.15	887.74	-0.1	0.773
Tert	139.3	123.66	-0.16	0.785
Rpa2	425.03	478.67	0.17	0.788
Mcm4	1237.46	1384.67	0.16	0.794
Atrx	4377.99	4686.07	0.1	0.795
Pot1a	430.48	456.89	0.08	0.795
Ssbp1	343.63	367.98	0.1	0.798
Pinx1	237.34	253.77	0.1	0.801
Ssrp1	4176.63	4433.32	0.09	0.81
Lin9	289.33	313.4	0.11	0.819
Rev3l	1840.42	1943.52	0.08	0.836
Mcmbp	3066.94	2955.16	-0.05	0.836
Upf1	4641.63	4486.52	-0.05	0.84
C77370	134.79	122.14	-0.14	0.852
Pole2	225.19	242.53	0.11	0.858
Rnaseh1	393.83	412.15	0.07	0.864
Gins4	460.62	484.61	0.07	0.865
Rad50	1301.43	1362.65	0.07	0.865
Stra13	610.82	634.64	0.05	0.88
Dnaja3	3042.46	3134.09	0.04	0.88
Rfc1	1781.71	1845.54	0.05	0.884
Top1mt	240.55	229.4	-0.07	0.886
Tnfaip1	5568.13	5784.12	0.05	0.887
Terf1	619.94	587.39	-0.07	0.891
Fhit	171.55	163.92	-0.07	0.897
Rev1	562.41	536.83	-0.07	0.9
Nfic	1024.1	1075.6	0.07	0.906
Smarcal1	754.92	773.68	0.04	0.914
Tonsl	1102.89	1142.93	0.05	0.915
Tk2	543.67	564.19	0.05	0.916
Orc6	371.97	392.41	0.08	0.917
Dkc1	897.03	937.99	0.06	0.917
Dna2	256.38	274.04	0.09	0.917
Kat7	3310.17	3245.34	-0.03	0.923
Poll	390.9	376.97	-0.05	0.926
Chtf8	3413.43	3355.02	-0.03	0.927
Polk	543.31	574.42	0.08	0.928
Rpa3	266.01	275.96	0.05	0.929
Nup98	2015.89	2057.9	0.03	0.946
Thoc1	986.95	1008.04	0.03	0.947
Polg	2364.67	2334.91	-0.02	0.955
Rrm2b	306.12	312.77	0.03	0.956
Zfp259	1168.91	1152.31	-0.02	0.958
Recql5	946.13	928.22	-0.03	0.959
Zfp830	521.18	511.99	-0.03	0.961
Nasp	1553.1	1524.23	-0.03	0.965
Cdk9	1984.14	2014.73	0.02	0.966
Kctd13	170.77	167.04	-0.03	0.968
Supt16	2863.63	2891.6	0.01	0.969
Ing5	1096.53	1080.7	-0.02	0.973
Wrnip1	1389.5	1372.12	-0.02	0.973
Orc5	652.68	644.5	-0.02	0.975
Dtd1	246.82	241.84	-0.02	0.977
Pold4	493.49	498.49	0.01	0.981
Sin3a	2746.8	2768.32	0.01	0.984
Kin	621.11	615.05	-0.02	0.985
Tep1	10789.8	10714.6	-0.01	0.985
Ing4	1729.64	1750.73	0.02	0.985
Rfc3	479.38	484.52	0.02	0.986
Lig3	1823.82	1833.18	0.01	0.987
Orc4	1233.59	1227.06	-0.01	0.987
Mgme1	363.41	362.83	0	0.995
Mcm9	621.94	620.18	0	0.996
Wrn	1352.98	1353.8	0	0.997
Ctgf	9.71	17.76	0.66	1
Stra8	0.26	1	-0.1	1
Ccdc88a	11.56	13.26	0.19	1
Mcmdc2	0.26	1	-0.1	1
Poln	1.82	1.46	-0.13	1

## Sheet: REACTOME#1
G1/S-Specific Transcription (REACTOME)
Gene name	WT normalized counts	Triaka normalized counts	logFC	Adjusted P-Value
Ccne1	156.356	231.659	0.55223	0.0184
Rrm2	568.666	801.639	0.47229	0.206
Cdk1	933.14	1297.45	0.45	0.319
Tfdp1	1813.49	2009.09	0.15	0.381
Dhfr	587.72	704.39	0.25	0.453
Pola1	615.27	810.57	0.38	0.459
Orc1	420.37	374.83	-0.16	0.549
Fbxo5	254.87	315.58	0.3	0.552
Cdt1	608.44	703.91	0.21	0.568
Cdc6	212.36	252.25	0.24	0.588
Tyms	955.26	1069.31	0.16	0.629
E2f1	217.66	252.52	0.21	0.634
Pcna	1127.41	1228.35	0.12	0.733
Cdc45	357.45	414.32	0.21	0.736
Ccna1	20.53	17.6	-0.17	1

## Sheet: REACTOME#2
Resolution of Sister Chromatid Cohesion (REACTOME)
Gene name	WT normalized counts	Triaka normalized counts	logFC	Adjusted P-Value
Ahctf1	2358.34	2711.62	0.20019	0.0336
Stag2	3912.03	4669.09	0.25206	0.155
Bub3	1495.9	1803.29	0.27	0.163
Clasp2	649.39	740.38	0.19	0.169
Ndc80	239.76	362.82	0.56	0.181
Spc24	285.49	402.88	0.48	0.182
Nup85	916.33	1128.99	0.3	0.198
Cenpn	118.48	165.01	0.46	0.208
Kntc1	455.69	641.2	0.47	0.21
Cenph	95.17	133.38	0.47	0.24
Cenpi	175.56	255.51	0.51	0.242
Mis12	783.72	902.96	0.2	0.245
Ranbp2	6052.58	6741.86	0.15	0.264
Cenpe	971.38	1349.32	0.45	0.27
Incenp	1342.54	1716.81	0.34	0.31
Cdk1	933.14	1297.45	0.45	0.319
Kif18a	206.45	279.66	0.42	0.366
Casc5	579.11	836.41	0.49	0.381
Cdca5	306.05	403.71	0.38	0.384
Ckap5	2911.05	3349.16	0.2	0.394
Spc25	354	449.57	0.33	0.401
Itgb3bp	179.62	207.6	0.21	0.416
Birc5	605.5	804.9	0.39	0.419
Nuf2	300.36	421.05	0.45	0.445
Kif2c	365.77	493.96	0.41	0.448
Bub1	448.64	600.53	0.4	0.468
Ccnb2	777.07	1025.28	0.38	0.482
Cenpk	111.21	144.24	0.36	0.489
Sec13	3632.2	4029.7	0.15	0.489
Cenpa	687.94	882.02	0.34	0.497
Cenpl	358.14	423.08	0.24	0.497
Mlf1ip	152.69	191.89	0.32	0.498
Dsn1	243.43	313.4	0.35	0.511
Plk1	671.37	863.78	0.34	0.52
Cenpf	1138.28	1544.42	0.41	0.523
Spdl1	225.77	288.83	0.34	0.547
Bub1b	937.28	1206.14	0.34	0.55
Aurkb	660.56	862.98	0.36	0.552
Zwilch	365.51	464.73	0.33	0.576
Nup133	762.25	917.89	0.26	0.581
Ska1	78.8	104.27	0.38	0.6
Cdc20	847.27	1068.34	0.32	0.607
Ercc6l	284.82	356.91	0.31	0.608
Kif2a	1778.91	1911.21	0.1	0.627
Mad1l1	461.49	498.61	0.11	0.646
Ppp1cc	1962.23	2071.88	0.08	0.646
Nsl1	236.64	277.59	0.23	0.646
Nde1	878.44	1002.32	0.19	0.65
Sgol1	317.93	394.97	0.29	0.677
Ppp2r1a	10986.2	10328.6	-0.09	0.68
Nudc	1477.66	1591.07	0.11	0.682
Pafah1b1	6808.8	7221.74	0.08	0.692
Smc1a	3731.43	4019.14	0.11	0.701
Nup43	237.91	268.56	0.17	0.701
Cenpo	359.53	390.1	0.12	0.704
Sgol2	400.58	466.66	0.21	0.707
Smc3	2423.82	2608.85	0.11	0.723
Apitd1	61.36	74.36	0.26	0.745
Rangap1	3597.58	3798.57	0.08	0.756
Wapal	5236.36	5491.54	0.07	0.76
Pds5a	3983.2	4155.24	0.06	0.761
Cenpt	291.47	315.36	0.11	0.776
Nup107	569.42	635.78	0.16	0.786
Cenpq	205.47	236.96	0.2	0.79
Cdca8	650.02	741.85	0.18	0.791
Pmf1	577.31	636.53	0.14	0.791
Ppp2cb	3047.45	3212.49	0.07	0.794
Clip1	1906.24	2067.58	0.11	0.794
Ndel1	3025.32	2811.25	-0.1	0.795
Cenpm	102.95	122.26	0.23	0.798
Rad21	6444.35	6843.77	0.09	0.798
Zwint	1125.36	1183.79	0.07	0.802
Clasp1	1425.29	1478.39	0.05	0.814
Nup160	1215.04	1297.11	0.09	0.846
Stag1	1757.51	1835.46	0.06	0.861
Ppp2r5d	2320.14	2417.27	0.06	0.862
Ska2	186.83	206.25	0.14	0.863
Taok1	4290.39	4444.62	0.05	0.865
Cenpp	114.71	130.42	0.17	0.881
Ppp2r1b	1170.53	1131.86	-0.05	0.887
Ppp2r5e	2476.71	2404.38	-0.04	0.892
Seh1l	2118.53	2047.29	-0.05	0.894
Xpo1	4205.67	4091.1	-0.04	0.925
Nup98	2015.89	2057.9	0.03	0.946
Ppp2r5a	2603.52	2550.3	-0.03	0.947
Ppp2r5b	1194.2	1230.96	0.04	0.952
Mapre1	4894.16	4845.43	-0.01	0.965
Rcc2	2792.04	2846.81	0.03	0.965
Hdac8	342.84	336.96	-0.03	0.965
Pds5b	929.14	944.88	0.02	0.977
B9d2	66.52	67.7	0.02	0.982
Ppp2ca	12142.6	12059.4	-0.01	0.985
Cenpc1	678.92	674.25	-0.01	0.988
Zw10	1390.23	1392.91	0	0.997

## Sheet: GOCC
Chromosome, centromeric region (GOCC)
Gene name	WT normalized counts	Triaka normalized counts	logFC	Adjusted P-Value
Ahctf1	2358.34	2711.62	0.20019	0.0336
Cbx5	2981.68	3859.38	0.36684	0.0349
Dynlt3	2431.61	2884.78	0.24	0.0548
Suv420h2	2641.33	2341.57	-0.17	0.1
Psen1	9493.27	8423.44	-0.17	0.12
Stag2	3912.03	4669.09	0.25	0.155
Bub3	1495.9	1803.29	0.27	0.163
Clasp2	649.39	740.38	0.19	0.169
Ndc80	239.76	362.82	0.56	0.181
Spc24	285.49	402.88	0.48	0.182
Nup85	916.33	1128.99	0.3	0.198
Cenpn	118.48	165.01	0.46	0.208
Kntc1	455.69	641.2	0.47	0.21
Cenph	95.17	133.38	0.47	0.24
Cenpi	175.56	255.51	0.51	0.242
Mis12	783.72	902.96	0.2	0.245
Nudcd2	731.45	847.38	0.21	0.245
Ppp1r12a	3619.18	3218.49	-0.17	0.27
Cenpe	971.38	1349.32	0.45	0.27
Mki67	7204.5	10225.8	0.48	0.297
Ska3	177.04	257.99	0.51	0.3
Incenp	1342.54	1716.81	0.34	0.31
Mis18bp1	320.21	449.29	0.46	0.328
Esco2	351.61	487.38	0.45	0.332
Dynll1	2463.43	2932.52	0.25	0.352
Pbrm1	3469.74	3875.29	0.16	0.354
Apc	5105.86	5455.27	0.09	0.359
Casc5	579.11	836.41	0.49	0.381
Spag5	759.43	1002.06	0.38	0.386
Spc25	354	449.57	0.33	0.401
Itgb3bp	179.62	207.6	0.21	0.416
Birc5	605.5	804.9	0.39	0.419
Cebpb	206.93	251.14	0.27	0.427
Nuf2	300.36	421.05	0.45	0.445
Kif2c	365.77	493.96	0.41	0.448
Bub1	448.64	600.53	0.4	0.468
Cenpk	111.21	144.24	0.36	0.489
Sec13	3632.2	4029.7	0.15	0.489
Cenpa	687.94	882.02	0.34	0.497
Cenpl	358.14	423.08	0.24	0.497
Mlf1ip	152.69	191.89	0.32	0.498
Rec8	244.83	293.79	0.25	0.509
Dsn1	243.43	313.4	0.35	0.511
Plk1	671.37	863.78	0.34	0.52
Cenpf	1138.28	1544.42	0.41	0.523
Dctn1	5470.27	5076.73	-0.11	0.53
Hells	749.37	938.62	0.31	0.543
Spdl1	225.77	288.83	0.34	0.547
Bub1b	937.28	1206.14	0.34	0.55
Aurkb	660.56	862.98	0.36	0.552
Wdhd1	598.48	700.71	0.22	0.568
Zwilch	365.51	464.73	0.33	0.576
Nup133	762.25	917.89	0.26	0.581
Cbx1	1766.03	1926.01	0.12	0.596
Ska1	78.8	104.27	0.38	0.6
Knstrn	707.08	882.19	0.3	0.608
Ctcf	3041.7	3256.96	0.1	0.608
Ercc6l	284.82	356.91	0.31	0.608
Lrwd1	547.96	509.02	-0.11	0.634
Mad1l1	461.49	498.61	0.11	0.646
Oip5	88.6	112.91	0.33	0.646
Nsl1	236.64	277.59	0.23	0.646
Nde1	878.44	1002.32	0.19	0.65
Tpr	6561.47	6970.18	0.09	0.651
Dscc1	70.34	85.68	0.27	0.654
Baz1b	5016.49	5299.5	0.08	0.666
Sgol1	317.93	394.97	0.29	0.677
Ncapd3	1201.95	1367.64	0.18	0.678
Ppp2r1a	10986.2	10328.6	-0.09	0.68
Csnk1a1	15124	14350.4	-0.08	0.691
Pafah1b1	6808.8	7221.74	0.08	0.692
Smc1a	3731.43	4019.14	0.11	0.701
Nup43	237.91	268.56	0.17	0.701
Nek2	853.12	1041.94	0.27	0.702
Zfp330	948.55	894.66	-0.08	0.703
Cenpo	359.53	390.1	0.12	0.704
Sgol2	400.58	466.66	0.21	0.707
Dapk3	1143	1069.14	-0.1	0.716
Mis18a	275.98	328.34	0.24	0.723
Smc3	2423.82	2608.85	0.11	0.723
Cenpb	7252.68	6842.69	-0.08	0.741
Apitd1	61.36	74.36	0.26	0.745
Sept7	2809.22	3041.12	0.11	0.753
Rangap1	3597.58	3798.57	0.08	0.756
Orc2	583.71	625.57	0.1	0.762
Dnmt3b	131.34	113.19	-0.2	0.771
Cenpt	291.47	315.36	0.11	0.776
Suv39h2	119.89	144.36	0.25	0.782
Nup107	569.42	635.78	0.16	0.786
Cenpq	205.47	236.96	0.2	0.79
Cdca8	650.02	741.85	0.18	0.791
Pmf1	577.31	636.53	0.14	0.791
Ppp2cb	3047.45	3212.49	0.07	0.794
Ndel1	3025.32	2811.25	-0.1	0.795
Cenpv	758.4	794.75	0.07	0.797
Cenpm	102.95	122.26	0.23	0.798
Rad21	6444.35	6843.77	0.09	0.798
Pinx1	237.34	253.77	0.1	0.801
Zwint	1125.36	1183.79	0.07	0.802
Dnmt1	2680.79	2940.75	0.13	0.807
Clasp1	1425.29	1478.39	0.05	0.814
Cenpw	95.33	107.6	0.17	0.829
Mtbp	275.79	305.35	0.14	0.831
Dctn5	2140.66	2261.57	0.08	0.845
Nup160	1215.04	1297.11	0.09	0.846
Psen2	485.35	460.02	-0.07	0.86
Bod1	1051.16	1016.25	-0.05	0.862
Suv39h1	597.45	654.77	0.13	0.863
Ska2	186.83	206.25	0.14	0.863
Kat2b	1730.28	1643.61	-0.07	0.865
Crebbp	2051.23	1945.49	-0.07	0.875
Stra13	610.82	634.64	0.05	0.88
Cenpp	114.71	130.42	0.17	0.881
Trp53bp1	1703.46	1603.48	-0.08	0.882
Dync1i1	95.84	102.77	0.1	0.885
Seh1l	2118.53	2047.29	-0.05	0.894
Dctn2	4788.16	4669.65	-0.04	0.903
Kat8	501.19	480.53	-0.06	0.915
Sept6	218.17	232.78	0.09	0.917
Ikzf1	61.89	65.54	0.08	0.925
Xpo1	4205.67	4091.1	-0.04	0.925
Ngdn	998.24	976.57	-0.03	0.928
Champ1	949.3	919.85	-0.04	0.937
Ss18l1	371	362.64	-0.03	0.942
Nup98	2015.89	2057.9	0.03	0.946
Ppp2r5a	2603.52	2550.3	-0.03	0.947
Zfp207	4541.53	4610.34	0.02	0.955
Dnmt3a	2100.33	2054.03	-0.03	0.964
Rcc2	2792.04	2846.81	0.03	0.965
Tnks	1875.94	1844.98	-0.02	0.972
Dync1li1	1938.59	1963.6	0.02	0.972
Dctn6	1724.5	1695.61	-0.02	0.973
Sin3a	2746.8	2768.32	0.01	0.984
Sept2	4974.95	5002.89	0.01	0.984
Ppp2ca	12142.6	12059.4	-0.01	0.985
Suv420h1	2788.73	2802.22	0.01	0.987
Cenpc1	678.92	674.25	-0.01	0.988
Dctn3	1734.51	1739.26	0	0.996
Zw10	1390.23	1392.91	0	0.997
Aurkc	1	0.45	0.23	1
Stag3	3.08	7.92	0.66	1
Tex14	2.01	1.46	-0.2	1
