# Supplementary material for: The ESRP1-GPR137 axis contributes to intestinal pathogenesis
Source: eLife journal article supplement (doi:10.7554/elife.28366), 2017-10-04
Supplement: supp [file elife-28366-supp-v1.zip › elife_poa_e28366_Figure_6_source_data_1.xlsx]

## Sheet: Sheet1
Association of (nuclear) ESRP1 expression with clinicopathological features in 185 CRC patients
Feature		N	Esrp1 %		Mean score of ranks or "r"	P-value
			Mean	Median
Patient age	Corr coeff	175	68.1	71	-0.11	0.1562
Tumor size	Corr coeff	178	4.6	4.5	-0.22	0.0034
Gender	Male	83	25.6	13.75	88.9	0.8089
	Female	96	27.5	20	90
Histological subtype	Non-mucinous	160	25.7	15	89.1	0.2976
	Mucinous	20	32.6	30	101.9
Tumor grade	G1-2	114	27.7	20	93.1	0.3805
	G3	66	24.3	14.4	86
Tumor location	Left-side	106	24.7	12.9	84.9	0.0318
	Rectum	23	38.5	39.2	116.1
	Right-side	50	25.2	15.8	88.7
pT	pT1-2	45	34.2	30	106.1	0.02
	pT3-4	135	23.9	15	85.3
pN	pN0	96	31	21.5	99.2	0.016
	pN1-2	84	21.3	12.1	80.5
pM	pM0	162	26.4	15.8	91.1	0.6587
	pM1	18	27.4	15	85.4
Venous invasion	Positive	31	25.9	15	88.2	0.6588
	Negative	152	26.4	15.8	92.8
Lymphatic invasion	Positive	69	21.8	11.7	80.7	0.0466
	Negative	111	29.4	21.3	96.6
Tumor buds	Corr coeff	181	11.2	9.5	-0.13	0.0938
Mismatch repair status	Proficient	167	26.7	15	92.6	0.3658
	Deficient	15	20.4	8.8	79.7
KRAS mutation status	Wild-type	121	25.5	15	89.1	0.4781
	Mutation	60	28.5	17.5	94.9
BRAF mutation status	Wild-type	161	27.4	20	90	0.1864
	Mutation	15	18	8.75	71.9
*The mean score of ranks when using Wilcoxon's Rank Sum Test. For continuous variables, a correlation coefficient "r" is used with values closer to 1 or -1 indicating a stronger positive or negative relationship, respectively.
Statistics: Wilcoxon’s Rank Sum or Kruskal-Wallis test
