# Supplementary material for: The ESRP1-GPR137 axis contributes to intestinal pathogenesis
Source: eLife journal article supplement (doi:10.7554/elife.28366), 2017-10-04
Supplement: supp [file elife-28366-supp-v1.zip › elife_poa_e28366_Figure_6_source_data_2.xlsx]

## Sheet: Sheet1
Univariate and multivariate survival analysis in 185 CRC patients
Feature		Univariate analysis		Multivariate analysis
		HR (95%CI)	P-value	HR (95%CI)	P-value
ESRP1 expression	Low	1.0		1.0
	High	0.594 (0.356-0.99)	0.0456	0.57 (0.34-0.97)	0.0368
Age	Baseline	1.0
	Per year	1.008 (0.986-1.03)	0.482	-
Tumor size	Baseline	1.0
	Per mm	1.05 (0.94-1.17)	0.3956	-
Gender	Male	1.0
	Female	0.968 0.62-1.513)	0.8869	-
Histological subtype	Adenocarcinoma	1.0
	Mucinous	1.346 (0.73-2.49)	0.3446	-
Tumor size	Baseline	1.0
	Per unit increase	1.049 (0.94-1.171)	0.3956	-
Tumor location	Left-sided	1.0
	Right-side	0.929 (0.556-1.55)	0.7769	-
pT stage	pT1-2	1.0		1.0
	pT3-4	3.061 (1.471-6.369)	0.0028	1.186 (0.445-3.159)	0.7332
pN stage	pN0	1.0		1.0
	pN1-2	3.971 (2.337-6.746)	<0.0001	2.315 (0.77-6.98)	0.7332
pM stage	pM0	1.0		1.0
	pM1	6.154 (3.571-10.6)	<0.0001	1.347 (0.61-2.99)	0.4648
Vascular invasion	V0	1.0		1.0
	V1	5.648 (3.552-8.981)	<0.0001	1.261 (0.5-3.54)	0.0014
Lymphatic invasion	L0	1.0		1.0
	L1	4.126 (2.544-6.691)	<0.0001	1.26 (0.45-3.54)	0.6591
Tumor budding	Low-grade	1.0
	High-grade	2.41 (1.52-3.84)	0.0002	1.93 (1.1-3.38)	0.0211
Mismatch repair status	Proficient	1.0
	Deficient	0.763 (0.307-1.893)	0.5594	-
Postoperative therapy	None	1.0
	Treated	1.517 (0.918-2.51)	0.1037	-
Statistics: Cox proportional hazards regression
