# Supplementary material for: The ESRP1-GPR137 axis contributes to intestinal pathogenesis
Source: eLife journal article supplement (doi:10.7554/elife.28366), 2017-10-04
Supplement: supp [file elife-28366-supp-v1.zip › elife_poa_e28366_Figure_6_source_data_3.xlsx]

## Sheet: Sheet1
Correlation of hGPR137_Short with Wnt target genes
Gene name	N	r	P-value
EFNB1	51	0.544	0.0001
HATH1	51	0.5122	0.0001
LGR5	51	0.5395	0.0001
MMP14	51	0.5157	0.0001
SOX9	51	0.5409	0.0001
SRSF3	51	-0.4383	0.0013
EPHB3	51	0.432	0.0015
AXIN2	51	0.4249	0.0019
TCF1	51	0.4041	0.0033
ADAM10	51	0.4	0.0036
EPHB2	51	0.3907	0.0046
FSCN1	51	0.3881	0.0049
ASCL2	51	0.3838	0.0054
HES1	51	0.3308	0.0177
MYC	51	0.3245	0.0202
MYB	51	0.3208	0.0217
ECN1	51	0.3198	0.0222
JUN	51	0.3061	0.0289
S100A4	51	-0.2929	0.037
DNMT1	51	0.2764	0.0496
Statistics: Pearson correlation
