# Supplementary material for: The ESRP1-GPR137 axis contributes to intestinal pathogenesis
Source: eLife journal article supplement (doi:10.7554/elife.28366), 2017-10-04
Supplement: supp [file elife-28366-supp-v1.zip › elife_poa_e28366_Supplementary_file_1.xlsx]

## Sheet: Sheet1
Antibodies and conjugates used for flow cytometry analysis
Specificity	Clone name	Conjugated to	Catalog number	Source	RRID
CD45	104	PE	109807	BioLegend	RRID:AB_313444
CD326 (EpCam)	G8.8	PE-Cy7	118215	BioLegend	RRID:AB_1236477
CD324 (E-Cadherin)	DECMA-1	biotin	13-3249	eBioscience	RRID:AB_1659689
Streptavidin-biotin		PE	405203	BioLegend
Mouse IgG1	RMG1-1	FITC	406605	BioLegend	RRID:AB_493292
Mouse IgG2b	RMG2b-1	PE	406707	BioLegend	RRID:AB_2563380
p-Stat3 (tyr705)	D3A7	Alexa-Fuor 647	4324	Cell Signaling	RRID:AB_10694637
p-mTOR (S2448)	MRRBY	PE	12-9718	eBioscience	RRID:AB_2572723
p-AKT	SDRNR	eFuor450	48-9715	eBioscience	RRID:AB_2574125
p-ERK1/2	MILAN8R	PerCP-eFluor® 710	46-9109	eBioscience	RRID:AB_2573871
Active-β-Catenin	8E7	purified	05-665	Merck Millipore	RRID:AB_309887
Annexin V		APC	640920	Biolegend	RRID:AB_2561515
Isotype	MOPC-21	Biotin	400103	Biolegend	RRID:AB_326427
Isotype	DA1E	Alexa Fluor 647	2985	Cell Signaling	RRID:AB_1196589
Isotype	eBM2a	PE	12-4724	eBioscience	RRID:AB_1603328
Isotype	eBM2a	eFluor450	48-4724	eBioscience	RRID:AB_1272010
Isotype	P3.6.2.8.1	PerCP-eFluor® 710	46-4714	eBioscience	RRID:AB_1834453
Isotype	eBR2a	purified	14-4321	eBioscience	RRID:AB_470104
