# Supplementary material for: The ESRP1-GPR137 axis contributes to intestinal pathogenesis
Source: eLife journal article supplement (doi:10.7554/elife.28366), 2017-10-04
Supplement: supp [file elife-28366-supp-v1.zip › elife_poa_e28366_Supplementary_file_2.docx]

## Supplementary file 2 – Self-designed primers for qPCR analysis

| Gene | Forward primer 5’->3’ | Reverse primer 5’->3’ |
| --- | --- | --- |
| *Uap1* | TCAGAACGGGAAGGACAACC | GCCTCTGACTTTCCATTTGTAGC |
| *Magi1* | CCTCGGTGCCTGAACAAACA | TCCAGCTCCTCGGTGTGTA |
| *Gpr137_Short* | TGGCTTCTCTATTGCTGCCC | GCTGGTCCCCTGCACAAA |
| *Gpr137_Long* | AGCCTTGCGTACCACACTTT | CTTGAACACCACCTGCACAA |
| *hGPR137_Short* | ACTCCCTGTTCGTCATCTGC | CCTGGCACACACTGGTCC |
